# Supplementary material for: Screening and molecular mechanism research on bile microRNAs associated with chemotherapy efficacy in perihilar cholangiocarcinoma
Source: PubMed Central journal article supplement — iScience. 2024 Dec 4;27(12):111437. doi: 10.1016/j.isci.2024.111437 (PMC11664176; doi:10.1016/j.isci.2024.111437), 2024-12-04
Supplement: mmc1.pdf [file mmc1.pdf]

**iScience, Volume 27**

**Supplemental information**

**Screening and molecular mechanism research  
on bile microRNAs associated with chemotherapy  
efficacy in perihilar cholangiocarcinoma**

**Shijie Fu, Haizhen Du, Yuyang Dai, Kanglian Zheng, Guang Cao, Liang Xu, Yujie  
Zhong, Chuanxin Niu, Yan Kong, and Xiaodong Wang**

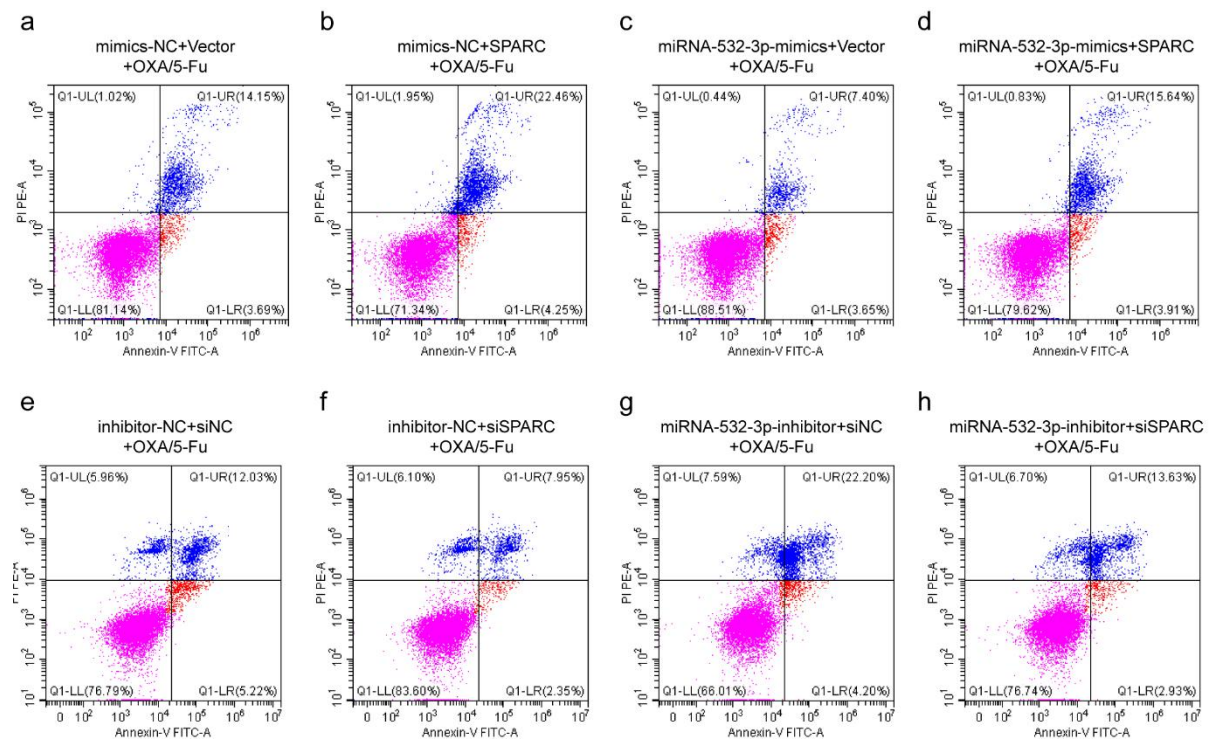

Figure S1. Representative flow cytometry analysis of apoptosis in QBC939 and FRH0201 cells after treatment with OXA/5-Fu and modulation of miR-532-3p and SPARC expression. (a-d) QBC939 cells were treated with OXA (5  $\mu\text{mol/L}$ ) and 5-Fu (10  $\mu\text{mol/L}$ ) following co-transfection with either miR-532-3p mimics (50 nM) or control (NC) and either SPARC (2  $\mu\text{g}$ ) or vector. (e-h) FRH0201 cells were treated with OXA (20  $\mu\text{mol/L}$ ) and 5-Fu (80  $\mu\text{mol/L}$ ) following co-transfection with either miR-532-3p inhibitor (100 nM) or control (NC) and either siSPARC (100 nM) or siNC. SPARC secreted protein acidic and rich in cysteine, OXA oxaliplatin, 5-Fu 5-fluorouracil, siRNA small interfering RNA, NC negative control.

**Table S1** The sequences of miRNA mimics, inhibitor, and siRNA

| Gene                  | Sequences ( 5'-3')                                                      |
|-----------------------|-------------------------------------------------------------------------|
| miR-532-3p-mimics     | Sense: CCUCCCACACCCAGGCUUGCA<br>Anti-sense: UGCAAGCCUUGGGUGUGGGAGG      |
| miR-1250-5p-mimics    | Sense: ACGGUGCUGGAUGGUGGCCUUU<br>Anti-sense: AAAGGCCACAUCCAGCACCGU      |
| miR-4772-5p-mimics    | Sense: UGAUCAGGCAAAAUUGCAGACU<br>Anti-sense: AGUCUGCAAUUUUGCCUGAUCA     |
| mimics-NC             | Sense: UCACAACCUCCUAGAAAGAGUAGA<br>Anti-sense: UCUACUCUUUCUAGGAGGUUGUGA |
| miR-532-3p-inhibitor  | UGCAAGCCUUGGGUGUGUGGGAGG                                                |
| miR-1250-5p-inhibitor | AAAGGCCACAUCCAGCACCGU                                                   |
| miR-4772-5p-inhibitor | AGUCUGCAAUUUUGCCUGAUCA                                                  |
| inhibitor-NC          | UCUACUCUUUCUAGGAGGUUGUGA                                                |
| si-SPARC              | AACAAGACCUUCGACUCUCC                                                    |
| si-NC                 | GCUCACAGCUCAAUCCUAAUC                                                   |

miR: microRNA; siRNA: small interfering RNA; NC: negative control; SPARC: secreted protein acidic and rich in cysteine.

**Table S2** Primer sequences in qPCR

| <b>Gene</b>    | <b>Forward 5' -3'</b>   | <b>Reverse 5' -3'</b> |
|----------------|-------------------------|-----------------------|
| miR-532-3p     | GGGCCTCCCACACCCAAGG     | CAGTGCGTGTCGTGGAGT    |
| miR-1250-5p    | GGGACGGTGCTGGATGTG      | CAGTGCGTGTCGTGGAGT    |
| miR-4772-5p    | GGGTGATCAGGCAAAATTG     | CAGTGCGTGTCGTGGAGT    |
| miR-3611       | GGGTTGTGAAGAAAGAAA      | CAGTGCGTGTCGTGGAGT    |
| U6             | CTCGCTTCGGCAGCACA       | AACGCTTCACGAATTTGCGT  |
| SPARC          | TGAGGTATCTGTGGGAGCTAATC | CCTTGCCGTGTTTGCAGTG   |
| $\beta$ -actin | CATGTACGTTGCTATCCAGGC   | CTCCTTAATGTCACGCACGAT |

qPCR: quantitative polymerase chain reaction; miR: microRNA; SPARC: secreted protein acidic and rich in cysteine.
